# Supplementary material for: Tumor- and osteoclast-derived NRP2 in prostate cancer bone metastases
Source: PubMed Central journal article supplement (PMC8121836; doi:10.1038/s41413-021-00136-2), 2021-05-14

**a**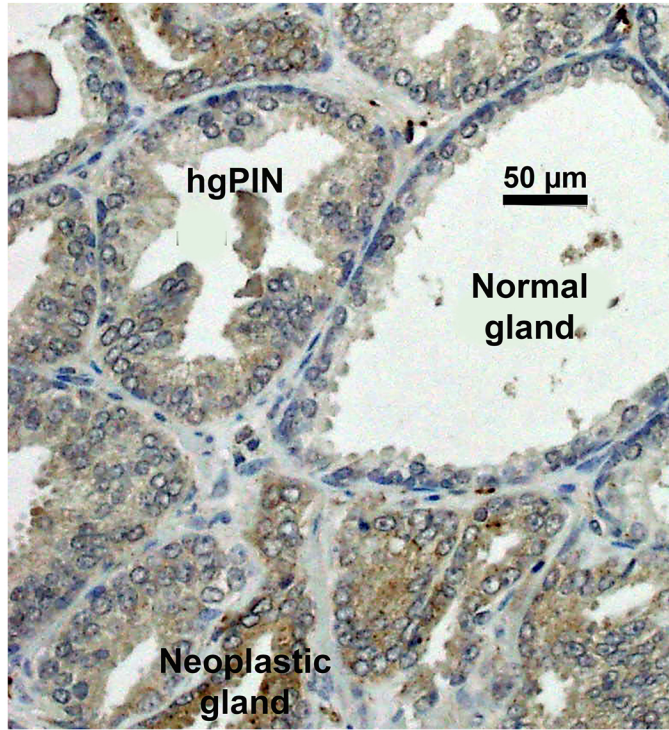**b**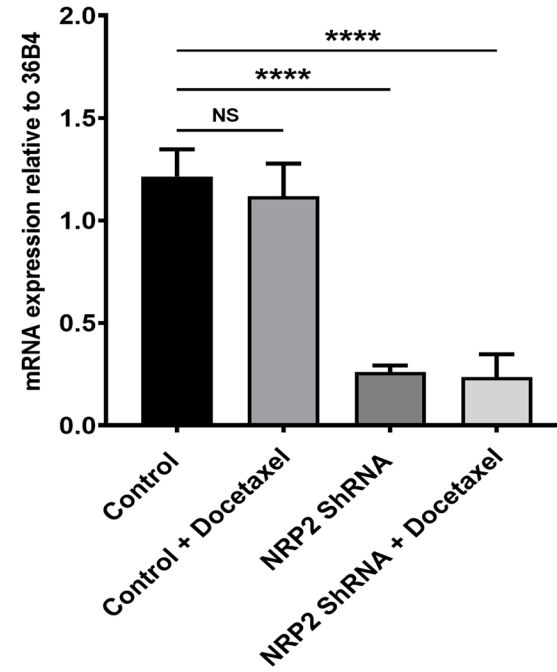**c**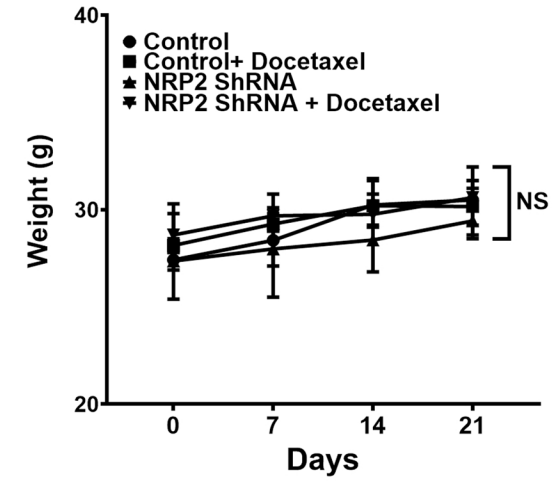**d**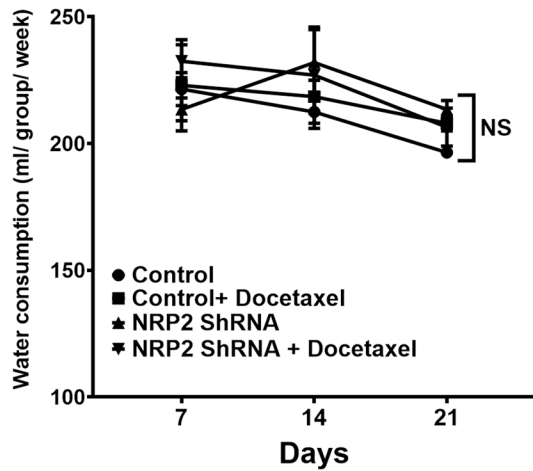**e**

PC3 scrambled siRNA

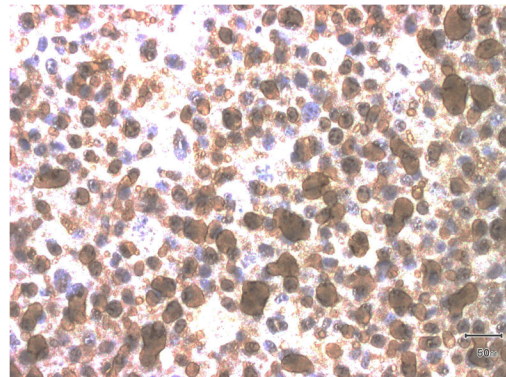

PC3 NRP2 siRNA

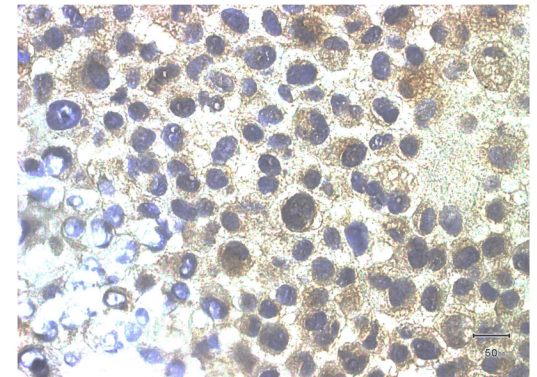

### RANKL + M-CSF

Day 4

Day 5

Day 6

**a**

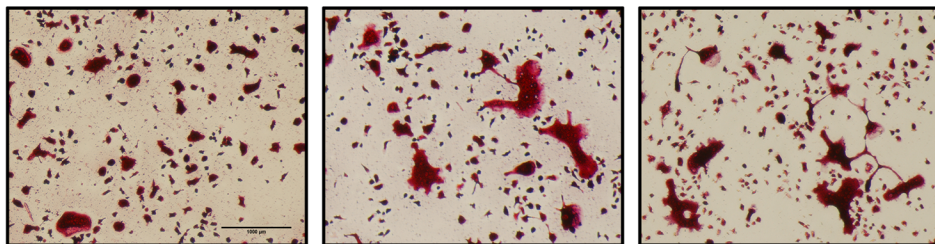

**b**

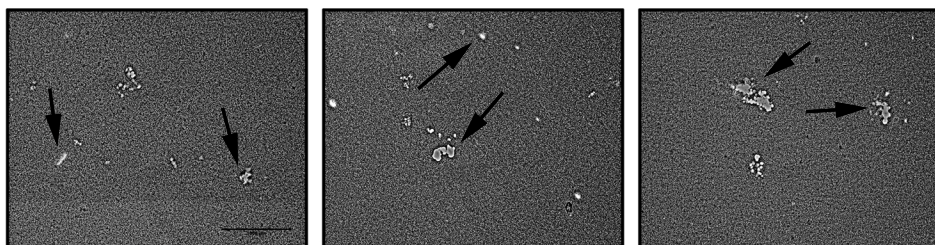

### LNCaP C4-2B CM

Day 4

Day 5

Day 6

**c**

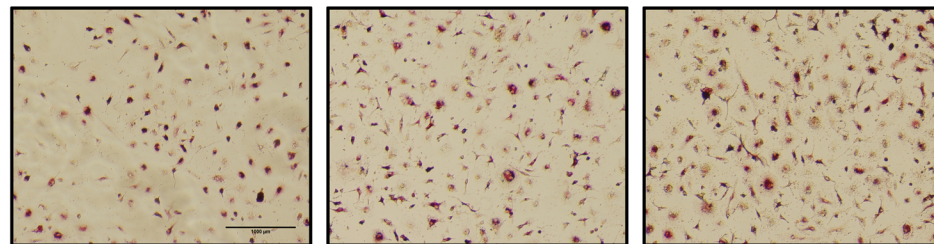

**d**

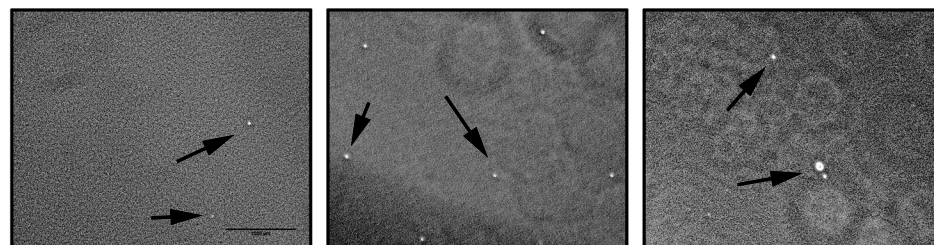

### PC3 CM

Day 4

Day 5

Day 6

**e**

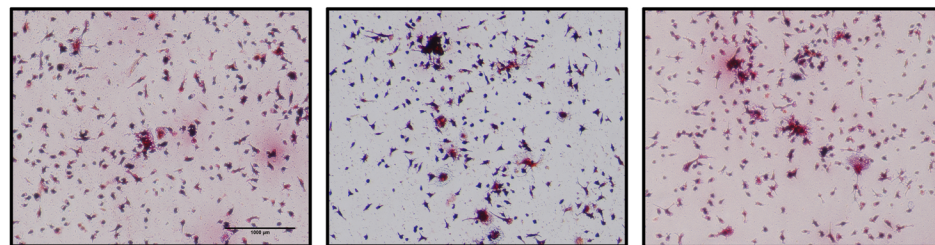

**f**

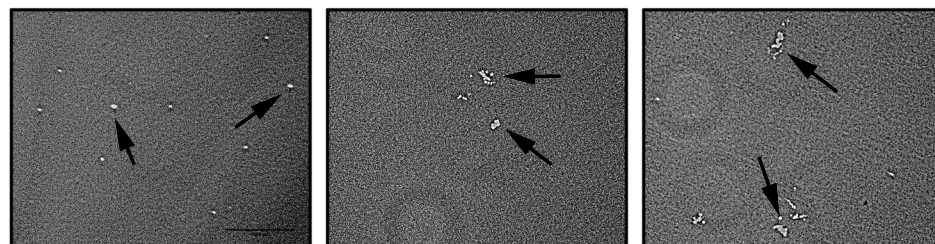

**g**

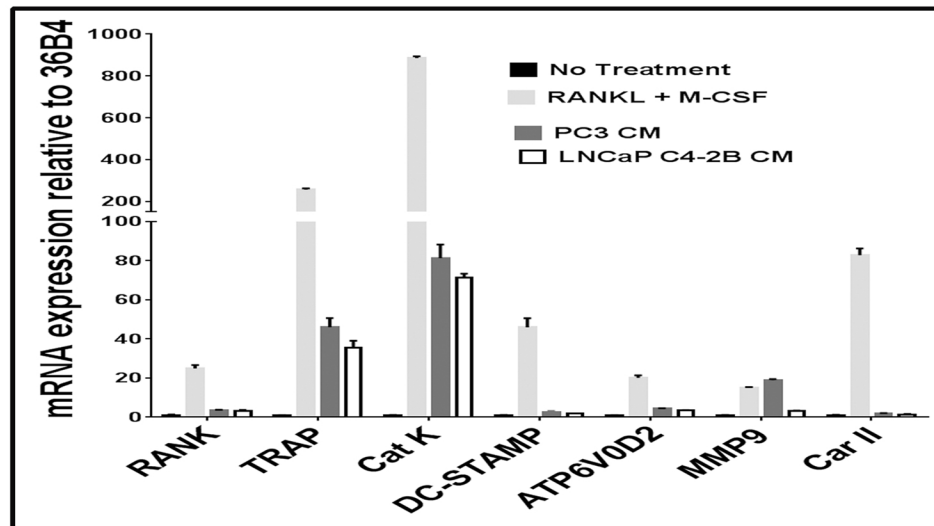

**h**

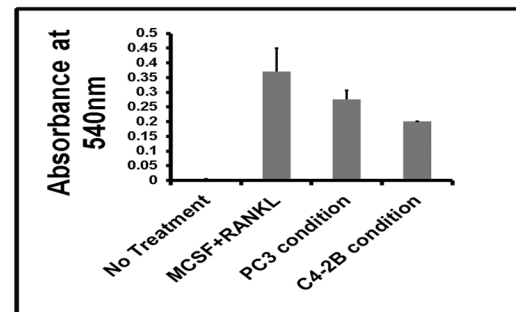

## RANKL + M-CSF

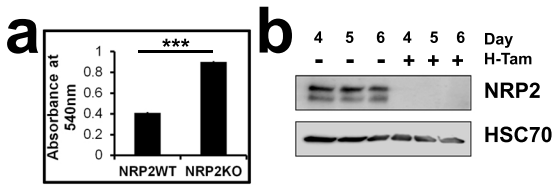

## LNCaP C4-2B CM

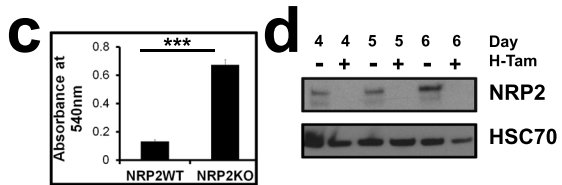

## PC3 CM

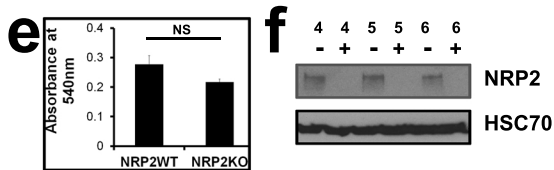

# RANKL + M-CSF

# LNCaP C4-2B CM

# PC3 CM

Scr

siNRP2

Scr

siNRP2

Scr

siNRP2

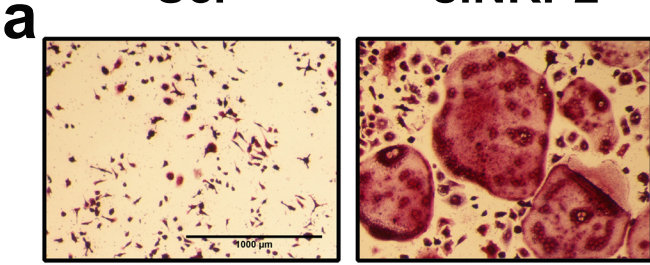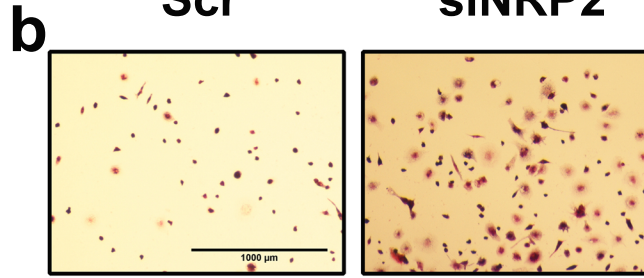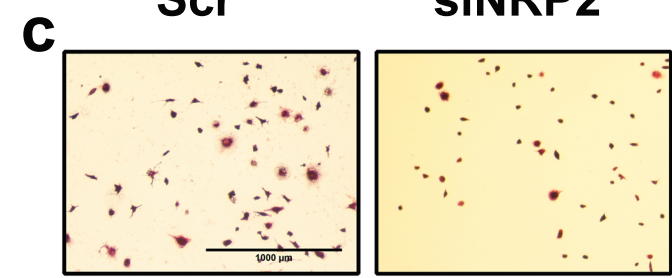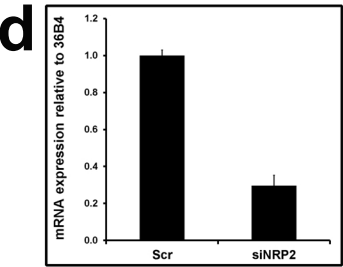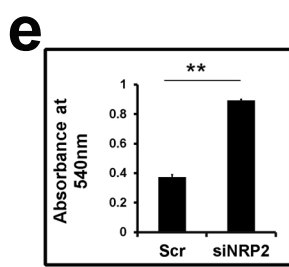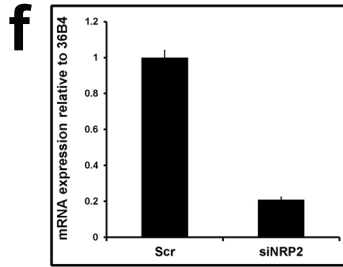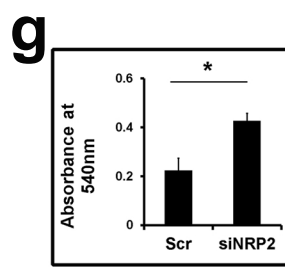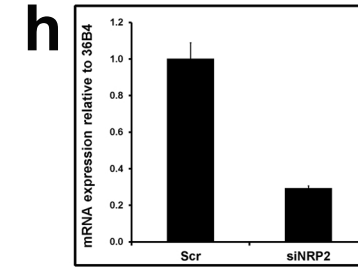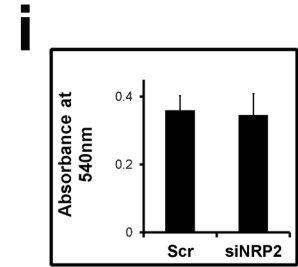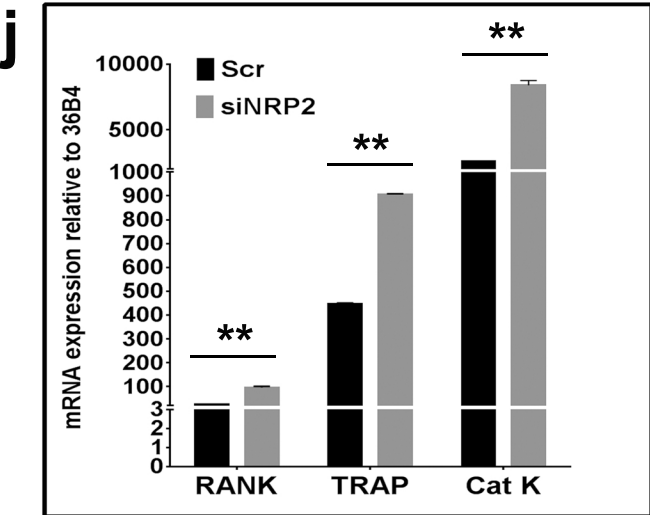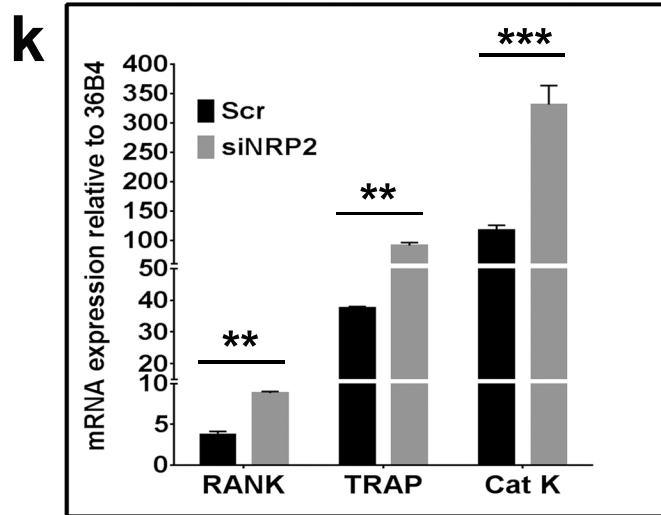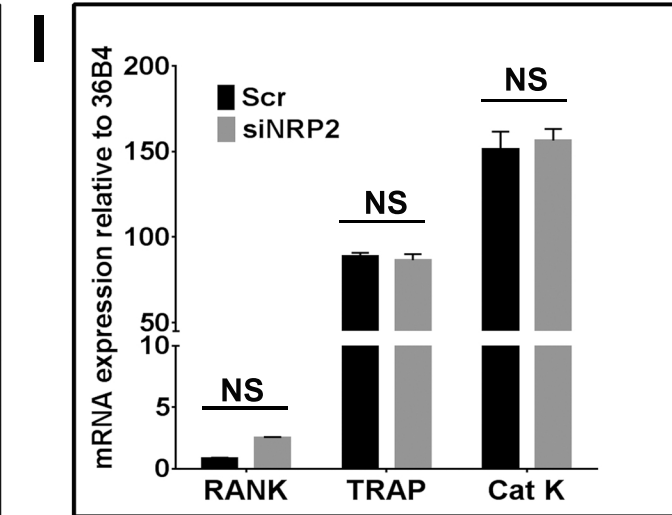

# Day 2

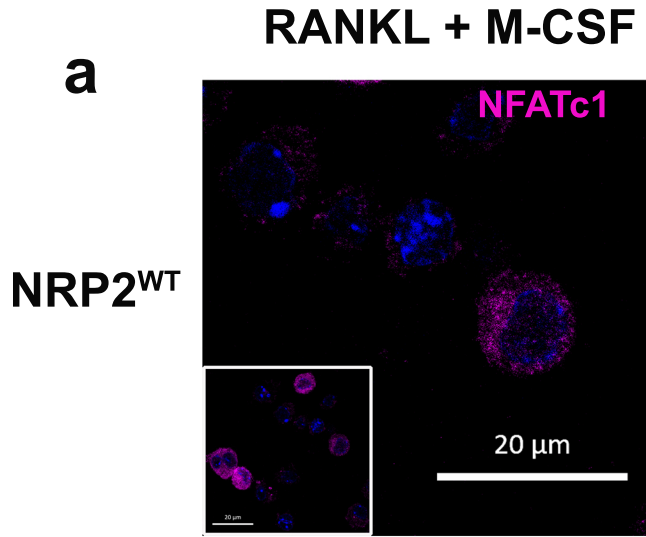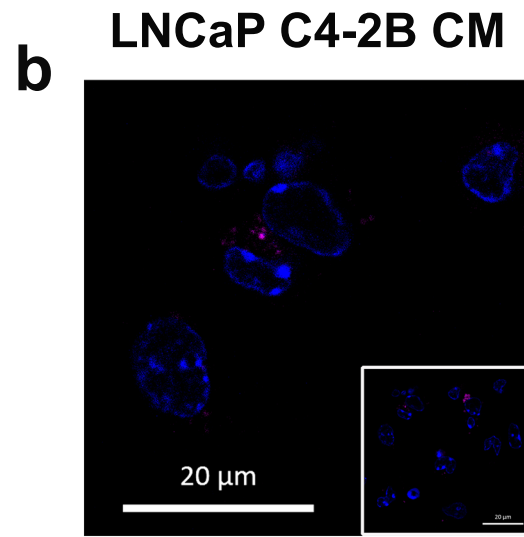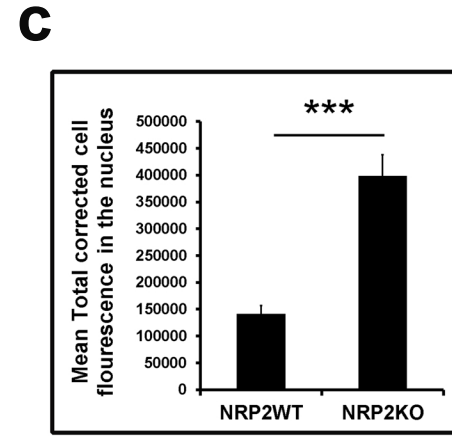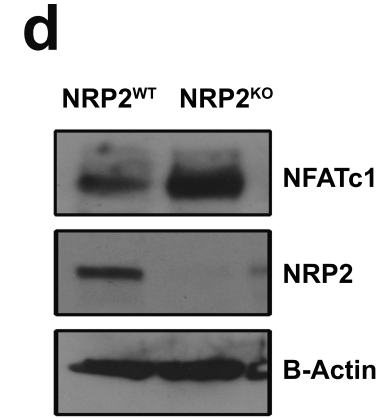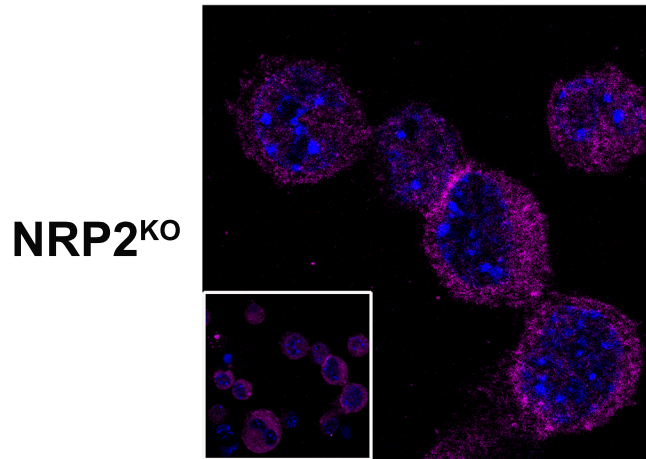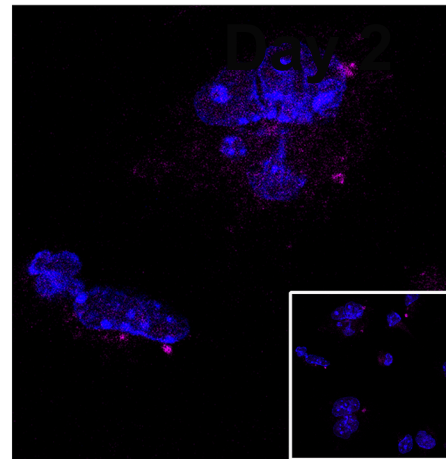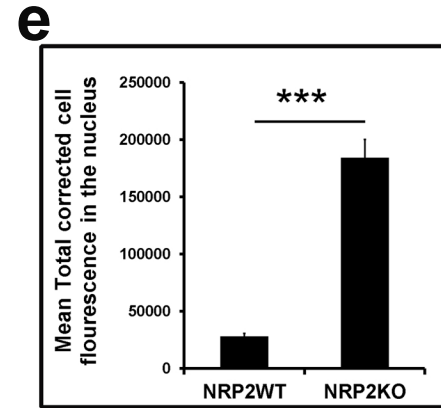

PC3 CM

Day 2

Day 3

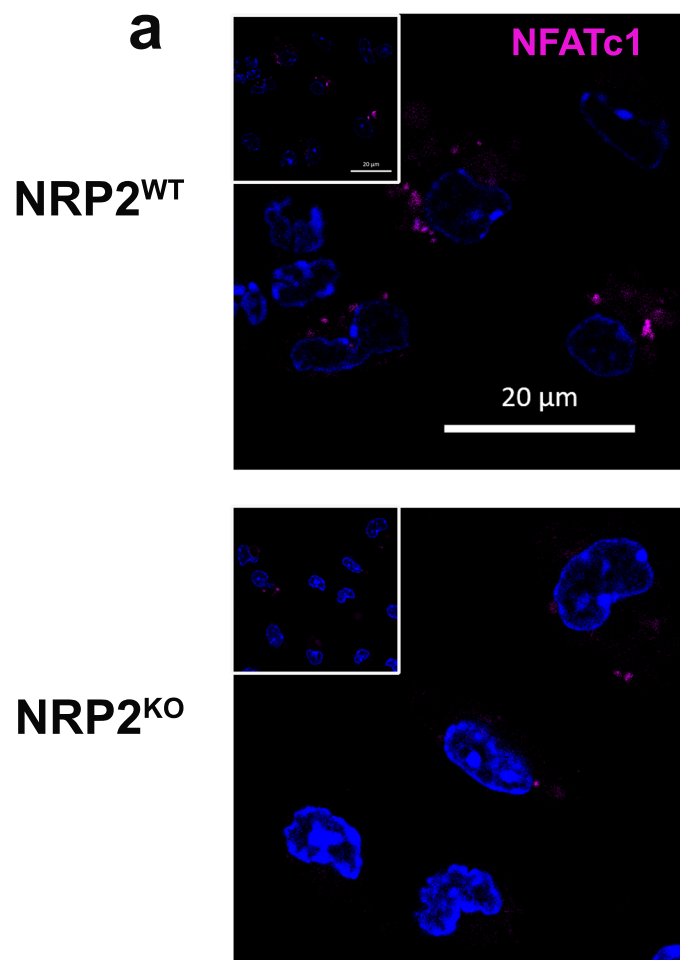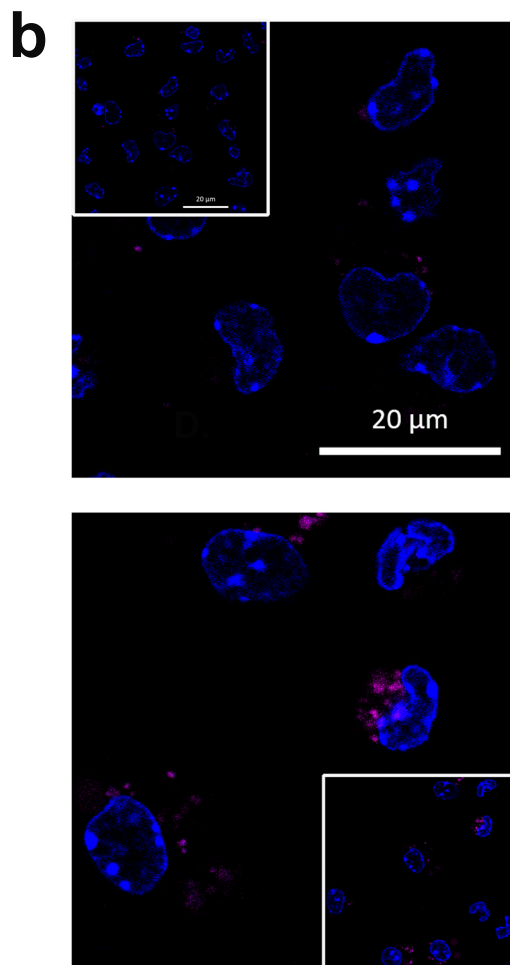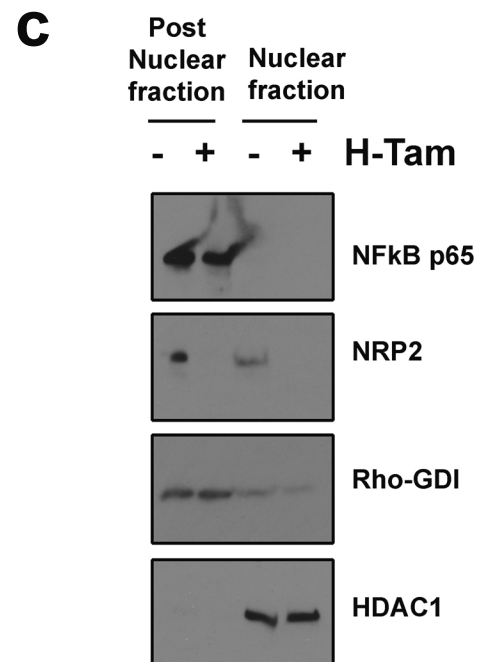

# Day 3

a

RANKL + M-CSF

NRP2<sup>WT</sup>

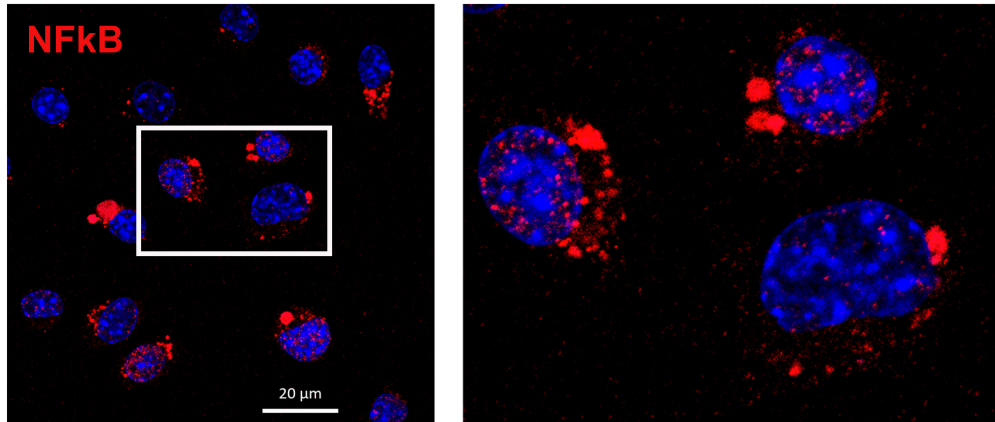

NRP2<sup>KO</sup>

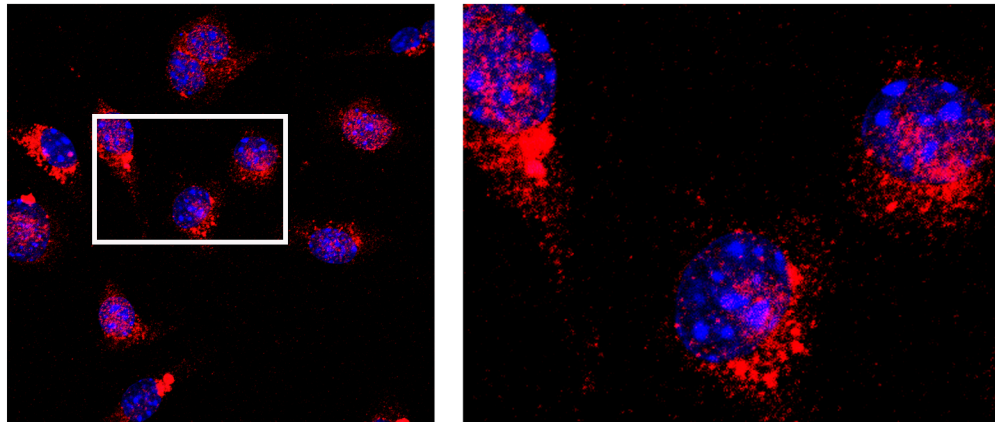

b

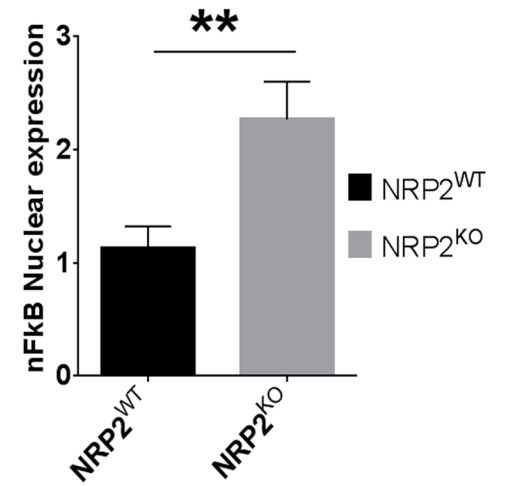

Supplement: 41413_2021_136_MOESM2_ESM.pdf [file 41413_2021_136_MOESM2_ESM.pdf]
