# Supplementary material for: Tumor- and osteoclast-derived NRP2 in prostate cancer bone metastases
Source: PubMed Central journal article supplement (PMC8121836; doi:10.1038/s41413-021-00136-2), 2021-05-14
Supplement: 41413_2021_136_MOESM3_ESM.pdf [file 41413_2021_136_MOESM3_ESM.pdf]

**Gene Name****Primer sequence****36B4**

FW: ATGCAGCAGATCCGCATGT

RV: TCATGGTGTTCTTGCCCATCA

**NRP2**

FW: GTGAAGAGTGAAGAGACTACCA

RV: GCTGAAGTTTTCCCCACACT

**TRAP**

FW: TACTTCACTGGAGTGCACGAT

RV: GAAGTTCAGCGCTTGGAGA

**Cathepsin K**

FW: GAGGGCCAACCTCAAGAAGAA

RV: GCCGTGGCGTTATACATACA

**DC-STAMP**

FW: GTATCGGCTCATCTCCTCCA

RV: ACTCCTTGGGTTCTTGCTT

**ATP6DOV2**

FW: AGAGGGGTTGCGGTTGTTAG

RV: GCCAGTGAGCAGGAAGTCAT

**MMP9**

FW: CTTAGATCATTCCAGCGT

RV: CAGATACTGGATGCCGTCTA

**Carbonic anhydrase II**

FW: ATTGGACCTGCCTCACAAGG

RV: CCACATGAGACACCTGGGTC

**VEGF-C**

FW: CAGTTGCGGTCTGTGTCCAGCGTAG

RV: GGACACACATGGAGGTTTAAAGAAG

**RANK**

FW: CAAACCTTGGACCAACTGCAC

RV: TGGTCTCCTCAGTGTCATGGAAG

**Supplementary Table 1:** Table showing the mouse-specific forward and reverse primers used in the gene expression analysis by real-time PCR.
